# Supplementary material for: Low carbon renewable natural gas production from coalbeds and implications for carbon capture and storage
Source: PubMed Central journal article supplement (PMC5603537; doi:10.1038/s41467-017-00611-7), 2017-09-18
Supplement: 41467_2017_611_MOESM1_ESM.pdf [file 41467_2017_611_MOESM1_ESM.pdf]

### **Description of Supplementary Files**

File Name: Supplementary Information

Description: Supplementary Figures and Supplementary Tables

File Name: Peer Review File

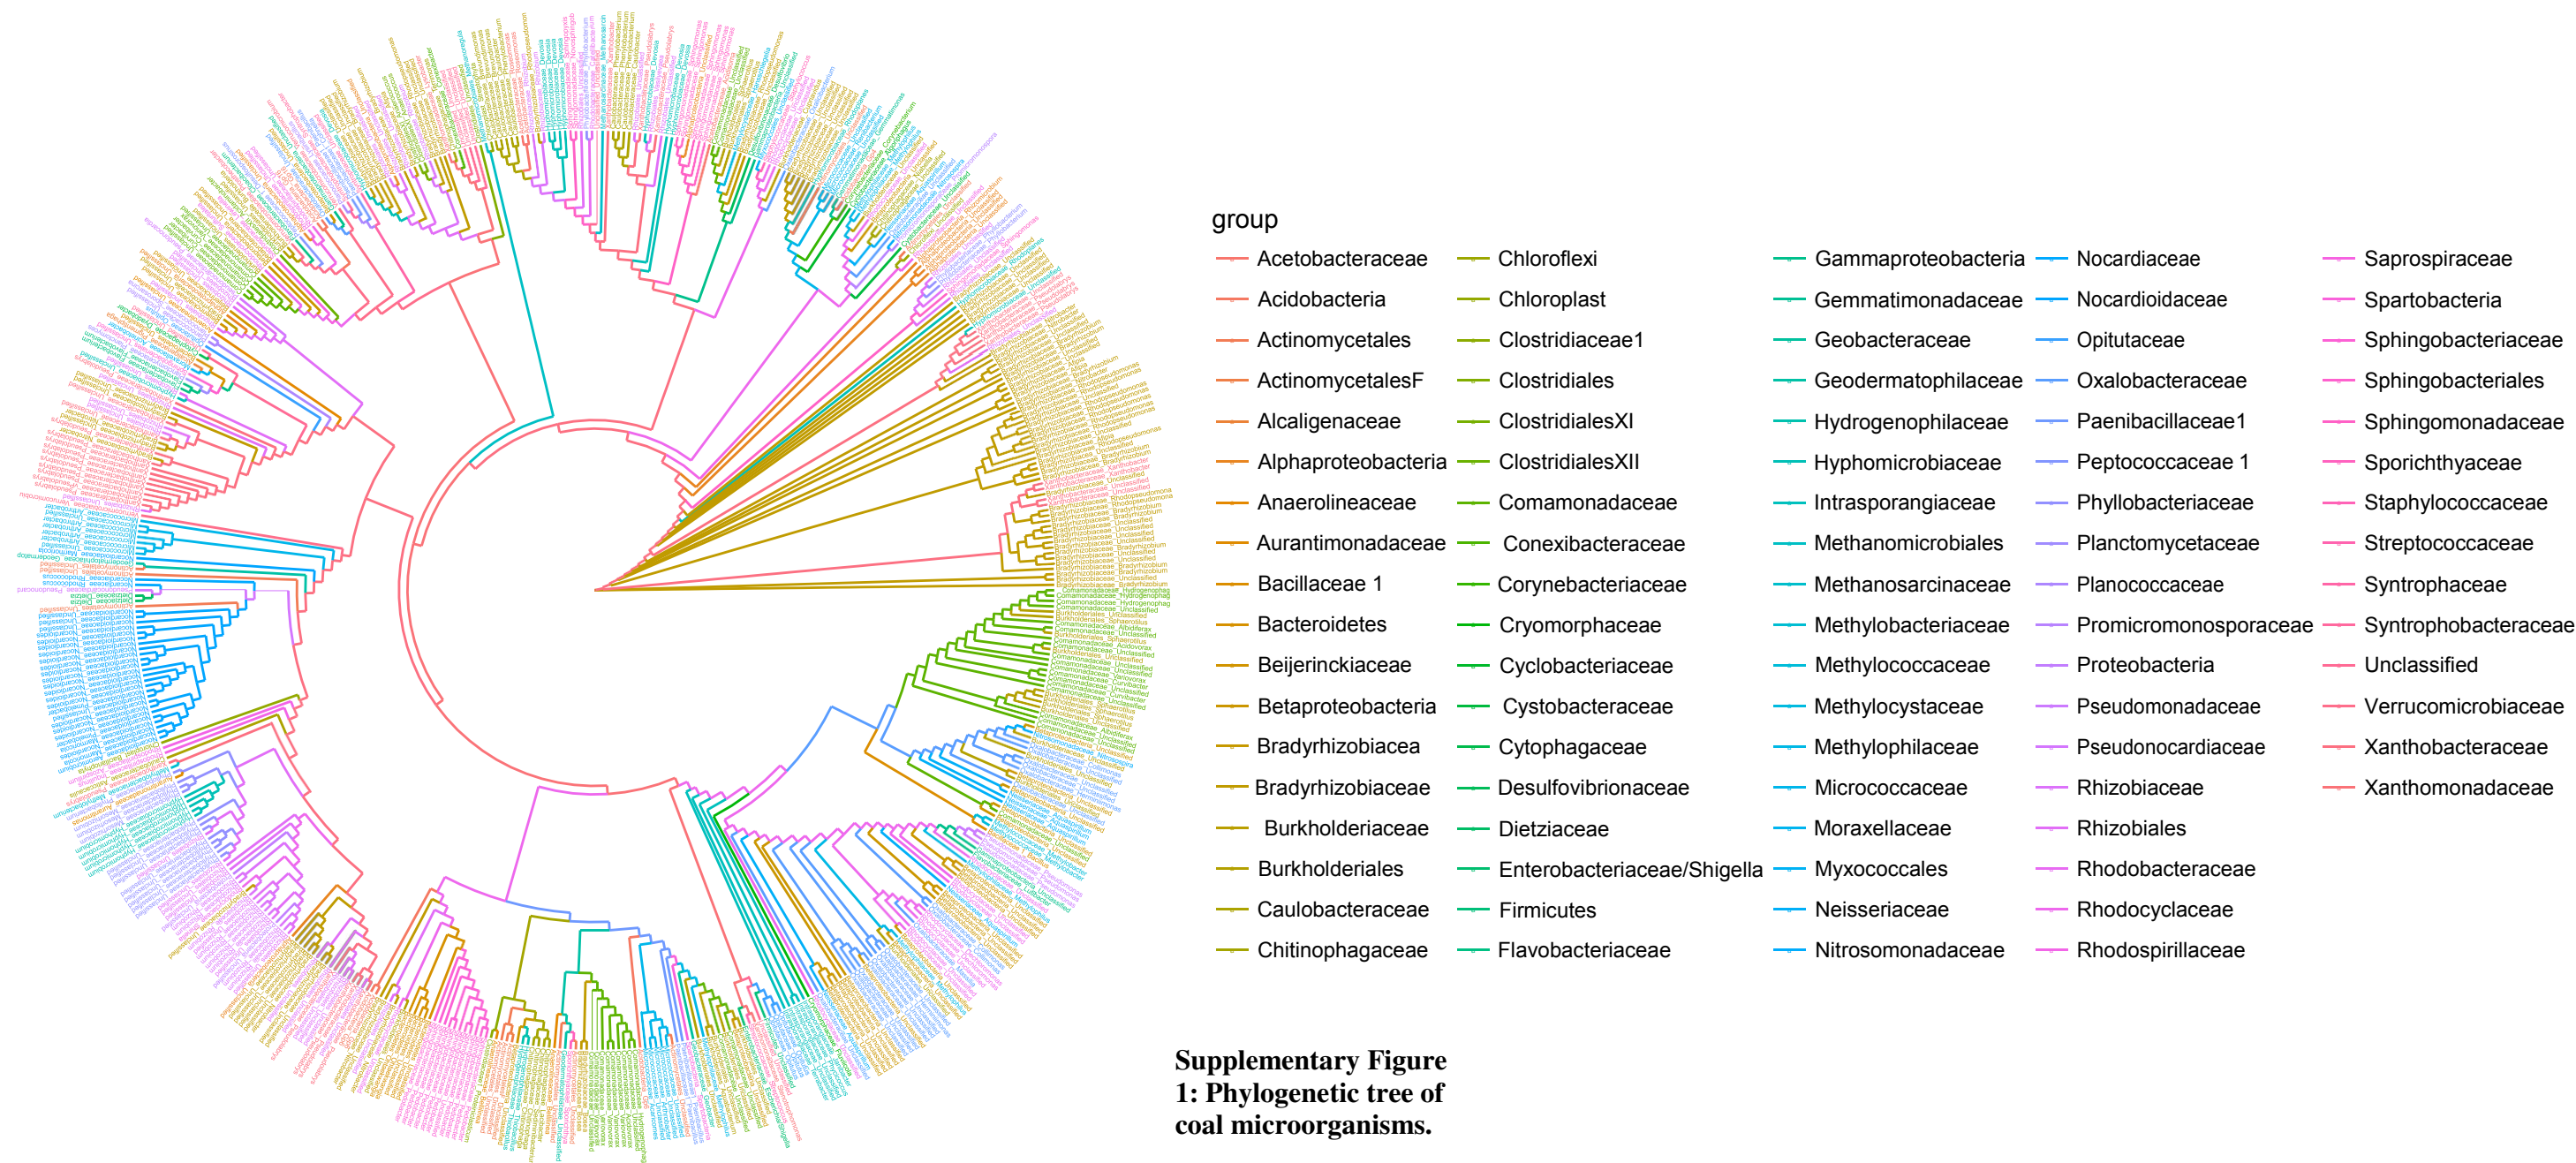

**Supplementary Figure 1: Phylogenetic tree of coal microorganisms.**

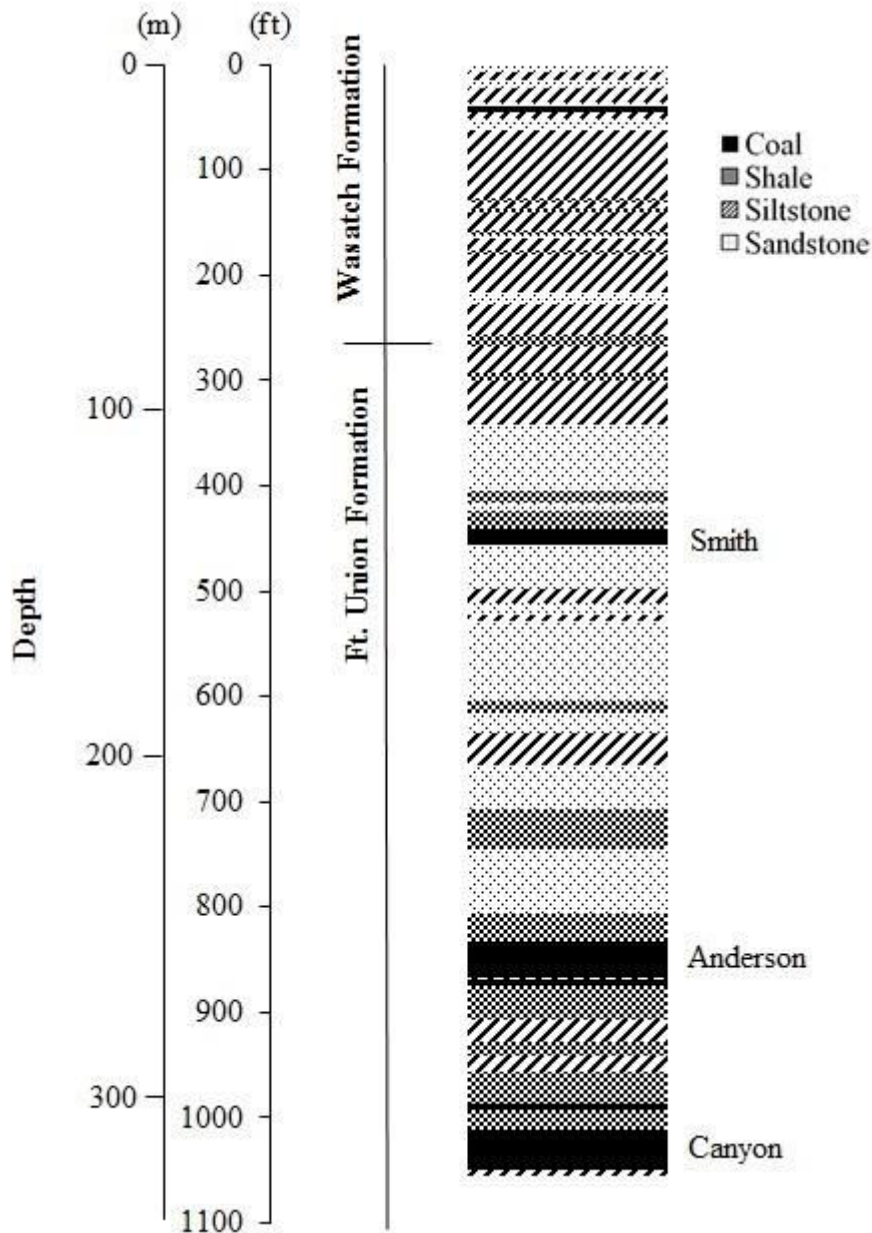

**Supplementary Figure 2: Stratigraphic column interpreted from petrophysical data collected from well Fed 41-18.** The stratigraphic column broadly classifies the geologic layers coal, shale, sandstone, and siltstone starting at a depth of 18 feet to 1053 feet (5~321 meters) below ground surface (bgs). The sampled well has a total depth of 1,053 feet (321 meters) bgs and intercepted three major coal seams: Smith, Anderson, and Canyon coals. The coal sample was collected from Canyon coal in the Wyodak coal zone with depth between 312-321 meters bgs.

**Supplementary Table 1: Conversion efficiencies for plant-derived carbohydrates**

| Treatment                                                    | Gal      | Man      | Glu      | Cel     | Xyl      | Ara      | Neg. Ctrl | AA Ctrl   | H <sub>2</sub> /CO <sub>2</sub> Ctrl |
|--------------------------------------------------------------|----------|----------|----------|---------|----------|----------|-----------|-----------|--------------------------------------|
| Concentration (g L <sup>-1</sup> )                           | 1.8      | 1.8      | 1.8      | 3.4     | 1.5      | 1.5      | 0         | 0.52      | 1                                    |
| Actual CH <sub>4</sub> (ml)                                  | 13.5     | 14.6     | 12.7     | 1.2     | 13.3     | 13.7     | 0         | 3.7       | 0.1                                  |
| Theoretical CH <sub>4</sub> (ml)                             | 29.3     | 30.6     | 29.5     | 56      | 25       | 24       | 0         | 10        | 10                                   |
| Theoretical specific yield (mol mol <sup>-1</sup> substrate) | 2.4      | 2.4      | 2.4      | 5.8     | 2        | 2        | 0         | 0.8       | 1                                    |
| Conversion efficiency (%)                                    | 46 ± 6.1 | 55 ± 6.9 | 42 ± 2.6 | 2 ± 2.1 | 54 ± 0.9 | 55 ± 1.5 | 0 ± 0     | 50 ± 10.7 | 1 ± 0.2                              |
| Stat. similarity                                             | a        | a        | a        | b       | a        | a        | b         | a         | b                                    |
| Day of peak                                                  | 77       | 65       | 65       | 106     | 83       | 73       | 0         | 83        | 83                                   |

**Supplementary Table 2: Coal analyses.** Ash (ASTM D-5142), Sulfur (ASTM D-4239), and energy content (ASTM D-5865) of coals

|                                      | 6-Carbon | Control incubated | 5-Carbon | Control non-incubated |
|--------------------------------------|----------|-------------------|----------|-----------------------|
| Ash, wt%                             | 9.27     | 9.95              | 11.785   | 10.905                |
| Sulfur, wt%                          | 0.298    | 0.305             | 0.283    | 0.298                 |
| Energy Content, Btu lb <sup>-1</sup> | 11,857   | 11,682            | 11,463   | 11,440                |

**Supplementary Table 3: Ultimate analysis and heating value of the sampled coal among the Canyon coal seam of the Wyodak coal zone in the PRB**

| Ultimate Analysis of coal | Moisture-free basis | Proximate Analysis of coal | Moisture-free basis |
|---------------------------|---------------------|----------------------------|---------------------|
| Carbon                    | 65.1%               | Volatile Matter            | 37.1%               |
| Hydrogen                  | 4.4%                | Fixed Carbon               | 48.4%               |
| Oxygen                    | 14.9%               | Ash                        | 14.5%               |
| Nitrogen                  | 0.9%                | Total                      | 100.0%              |
| Sulfur                    | 0.2%                | Btu lb <sup>-1</sup>       | 11,440              |
| Ash                       | 14.5%               |                            |                     |
| Total                     | 100.0%              |                            |                     |

**Supplementary Table 4: Coal microcosm treatments and controls**

| Substrate                                                                             | Concentration                          | Chemical Formula/M.W.                                                              |
|---------------------------------------------------------------------------------------|----------------------------------------|------------------------------------------------------------------------------------|
| D-galactose                                                                           | 10 mM                                  | C <sub>6</sub> H <sub>12</sub> O <sub>6</sub> /180.16                              |
| D-mannose                                                                             | 10 mM                                  | C <sub>6</sub> H <sub>12</sub> O <sub>6</sub> /180.16                              |
| D-glucose                                                                             | 10 mM                                  | C <sub>6</sub> H <sub>12</sub> O <sub>6</sub> /180.16                              |
| D-cellobiose                                                                          | 10 mM                                  | C <sub>12</sub> H <sub>22</sub> O <sub>11</sub> /342.3                             |
| D-xylose                                                                              | 10 mM                                  | C <sub>5</sub> H <sub>10</sub> O <sub>5</sub> /150.13                              |
| L-arabinose                                                                           | 10 mM                                  | C <sub>5</sub> H <sub>10</sub> O <sub>5</sub> /150.13                              |
| Mix:galactose, mannose, glucose, cellobiose, xylose, arabinose                        | 10 mM                                  | mix: equimolar of (galactose, mannose, glucose, cellobiose, xylose, and arabinose) |
| Negative control: (no substrate)                                                      | -                                      | -                                                                                  |
| Positive control: (acetic acid)                                                       | 10 mM                                  | C <sub>2</sub> H <sub>4</sub> O <sub>2</sub> /60.02                                |
| Positive control: Ultra High Purity 99.999% H <sub>2</sub> gas and NaHCO <sub>3</sub> | 12 mM (HCO <sub>3</sub> <sup>-</sup> ) | -                                                                                  |
